# Supplementary material for: Mapping Forage Biomass and Quality of the Inner Mongolia Grasslands by Combining Field Measurements and Sentinel-2 Observations
Source: MDPI journal article supplement (doi:10.3390/rs15081973), 2023-04-08
Supplement: s1 [file s1]

## Supplementary Information

# Mapping Forage Biomass and Quality of the Inner Mongolia Grasslands by Combining Field Measurements and Sentinel-2 Observations

Xia Zhao <sup>1,\*</sup>, Bo Wu <sup>1,2</sup>, Jinxin Xue <sup>1,2</sup>, Yue Shi <sup>1</sup>, Mengying Zhao <sup>1,2</sup>, Xiaoqing Geng <sup>1</sup>, Zhengbing Yan <sup>1</sup>, Haihua Shen <sup>1,2</sup> and Jingyun Fang <sup>1,3</sup>

<sup>1</sup> State Key Laboratory of Vegetation and Environmental Change, Institute of Botany, Chinese Academy of Sciences, Beijing, 100093, China

<sup>2</sup> University of Chinese Academy of Sciences, Beijing, 100049, China

<sup>3</sup> Institute of Ecology, College of Urban and Environmental Sciences, and Key Laboratory for Earth Surface Processes of the Ministry of Education, Peking University, Beijing 100871, China

\* Correspondence: zhaoxia@ibcas.ac.cn

The SI contains Tables S1–S6 and Figures S1–S5.

**Table S1.** A summary of initial vegetation status and gradient-cutting experiments of all 19 grass-land sites.

| Site ID | Latitude<br>(° N) | Longitude<br>(° E) | Dominant species                         | Initial coverage<br>(%) | Number of<br>cutting | Initial yield<br>(g m <sup>-2</sup> ) | Initial CF<br>(g m <sup>-2</sup> ) | Initial CP<br>(g m <sup>-2</sup> ) |
|---------|-------------------|--------------------|------------------------------------------|-------------------------|----------------------|---------------------------------------|------------------------------------|------------------------------------|
| 1       | 43.93             | 116.30             | <i>L. chinensis</i>                      | 50                      | 5                    | 178.8                                 | 53.2                               | 18.4                               |
| 2       | 43.86             | 116.42             | <i>S. Krylovii</i>                       | 65                      | 6                    | 260.6                                 | 81.6                               | 30.3                               |
| 3       | 43.60             | 116.67             | <i>S. Krylovii</i> & <i>L. chinensis</i> | 68                      | 6                    | 344.0                                 | 74.1                               | 34.0                               |
| 4       | 43.73             | 116.75             | <i>S. Krylovii</i>                       | 65                      | 6                    | 375.8                                 | 123.1                              | 38.4                               |
| 5       | 44.18             | 116.37             | <i>L. chinensis</i>                      | 65                      | 6                    | 324.1                                 | 89.8                               | 39.8                               |
| 6       | 44.18             | 116.37             | <i>L. chinensis</i>                      | 90                      | 8                    | 386.3                                 | 120.9                              | 41.0                               |
| 7       | 44.15             | 116.36             | <i>L. chinensis</i>                      | 60                      | 7                    | 230.2                                 | 67.2                               | 25.7                               |
| 8       | 44.22             | 116.26             | <i>S. Krylovii</i>                       | 60                      | 7                    | 422.0                                 | 152.1                              | 28.9                               |
| 9       | 44.22             | 116.26             | <i>S. Krylovii</i>                       | 55                      | 7                    | 378.9                                 | 132.1                              | 20.6                               |
| 10      | 44.39             | 116.86             | <i>S. Krylovii</i> & <i>L. chinensis</i> | 52                      | 7                    | 308.3                                 | 99.4                               | 34.6                               |
| 11      | 44.38             | 117.38             | <i>S. grandis</i>                        | 45                      | 7                    | 412.1                                 | 132.0                              | 56.8                               |
| 12      | 44.77             | 117.66             | <i>L. chinensis</i>                      | 45                      | 6                    | 302.2                                 | 85.7                               | 49.1                               |
| 13      | 44.01             | 115.89             | <i>L. chinensis</i>                      | 62                      | 8                    | 324.0                                 | 90.1                               | 42.4                               |
| 14      | 44.41             | 115.93             | <i>S. Krylovii</i> & <i>L. chinensis</i> | 55                      | 7                    | 438.8                                 | 148.3                              | 31.5                               |
| 15      | 44.61             | 115.85             | <i>L. chinensis</i>                      | 65                      | 7                    | 408.5                                 | 106.0                              | 70.8                               |
| 16      | 45.06             | 116.43             | <i>S. Krylovii</i> & <i>L. chinensis</i> | 76                      | 7                    | 312.5                                 | 100.5                              | 34.3                               |
| 17      | 44.09             | 116.20             | <i>S. grandis</i>                        | 53                      | 7                    | 757.0                                 | 211.2                              | 53.3                               |
| 18      | 44.27             | 116.55             | <i>S. grandis</i>                        | 90                      | 7                    | 996.4                                 | 366.1                              | 88.5                               |
| 19      | 44.24             | 116.31             | <i>S. Krylovii</i>                       | 50                      | 7                    | 640.9                                 | 202.6                              | 66.4                               |

**Table S2.** Spectral specifications of the Sentinel-2 MSI instrument.

| Band name  | Band number | Central wavelength (nm) | Bandwidth (nm) | Wavelength (nm) |
|------------|-------------|-------------------------|----------------|-----------------|
| Blue       | 2           | 490                     | 65             | 458             |
| Green      | 3           | 560                     | 35             | 543             |
| Red        | 4           | 665                     | 30             | 650             |
| NIR        | 8           | 842                     | 115            | 785             |
| Red-edge-1 | 5           | 705                     | 15             | 698             |
| Red-edge-2 | 6           | 740                     | 15             | 733             |
| Red-edge-3 | 7           | 783                     | 20             | 773             |
| Narrow NIR | 8A          | 842                     | 20             | 832             |
| SWIR-1     | 11          | 1610                    | 90             | 1565            |
| SWIR-2     | 12          | 2190                    | 180            | 2100            |

**Table S3.** A summary of multiple regression analysis for forage biomass.

|           | Df | Sum square | Mean square | F value | Pr(>F)      |
|-----------|----|------------|-------------|---------|-------------|
| LSWI      | 1  | 6.43       | 6.43        | 4281.7  | <0.001      |
| Site      | 18 | 2.28       | 0.13        | 84.43   | <0.001      |
| Cut       | 7  | 0.88       | 0.13        | 83.88   | <0.001      |
| LSWI:Site | 18 | 0.19       | 0.01        | 7.08    | <0.001      |
| LSWI:Cut  | 7  | 0.14       | 0.002       | 1.30    | <b>0.26</b> |
| Residuals | 70 | 0.11       | 0.002       |         |             |

**Table S4.** A summary of multiple regression analysis for forage CF<sub>area</sub>.

|           | Df | Sum square | Mean square | F value | Pr(>F)      |
|-----------|----|------------|-------------|---------|-------------|
| LSWI      | 1  | 5.77       | 5.77        | 2549.2  | <0.001      |
| Site      | 18 | 3.62       | 0.20        | 88.86   | <0.001      |
| Cut       | 7  | 1.25       | 0.18        | 79.17   | <0.001      |
| LSWI:Site | 18 | 0.24       | 0.01        | 5.97    | <0.001      |
| LSWI:Cut  | 7  | 0.01       | 0.002       | 0.67    | <b>0.70</b> |
| Residuals | 70 | 0.16       | 0.002       |         |             |

**Table S5.** A summary of multiple regression analysis for forage CP<sub>area</sub>.

|           | Df | Sum square | Mean square | F value | Pr(>F)      |
|-----------|----|------------|-------------|---------|-------------|
| LSWI      | 1  | 7.23       | 7.23        | 5381.8  | <0.001      |
| Site      | 18 | 1.36       | 0.08        | 56.27   | <0.001      |
| Cut       | 7  | 0.62       | 0.09        | 65.92   | <0.001      |
| LSWI:Site | 18 | 0.21       | 0.01        | 8.63    | <0.001      |
| LSWI:Cut  | 7  | 0.13       | 0.002       | 1.4     | <b>0.21</b> |
| Residuals | 70 | 0.09       | 0.001       |         |             |

**Table S6.** Livestock carrying capacity (AU per ha) estimated using forage biomass (DM), crude protein (CP), and the metabolizable energy (ME) respectively. AU refers to a national standard sheep with a mass of 50 kg which consumes 1400g of dry matter (forage biomass), 182g crude protein per day (reference to the national standard NY/T635-2015 and NY/T3647-2020; Ministry of Agriculture and Rural affairs of the People's Republic of China) and 18.46 MJ metabolizable energy per day [1].

|         | AU per day | AU per ha |
|---------|------------|-----------|
| DM (g)  | 1400       | 1.46      |
| CP (g)  | 182        | 1.25      |
| ME (MJ) | 18.46      | 1.27      |

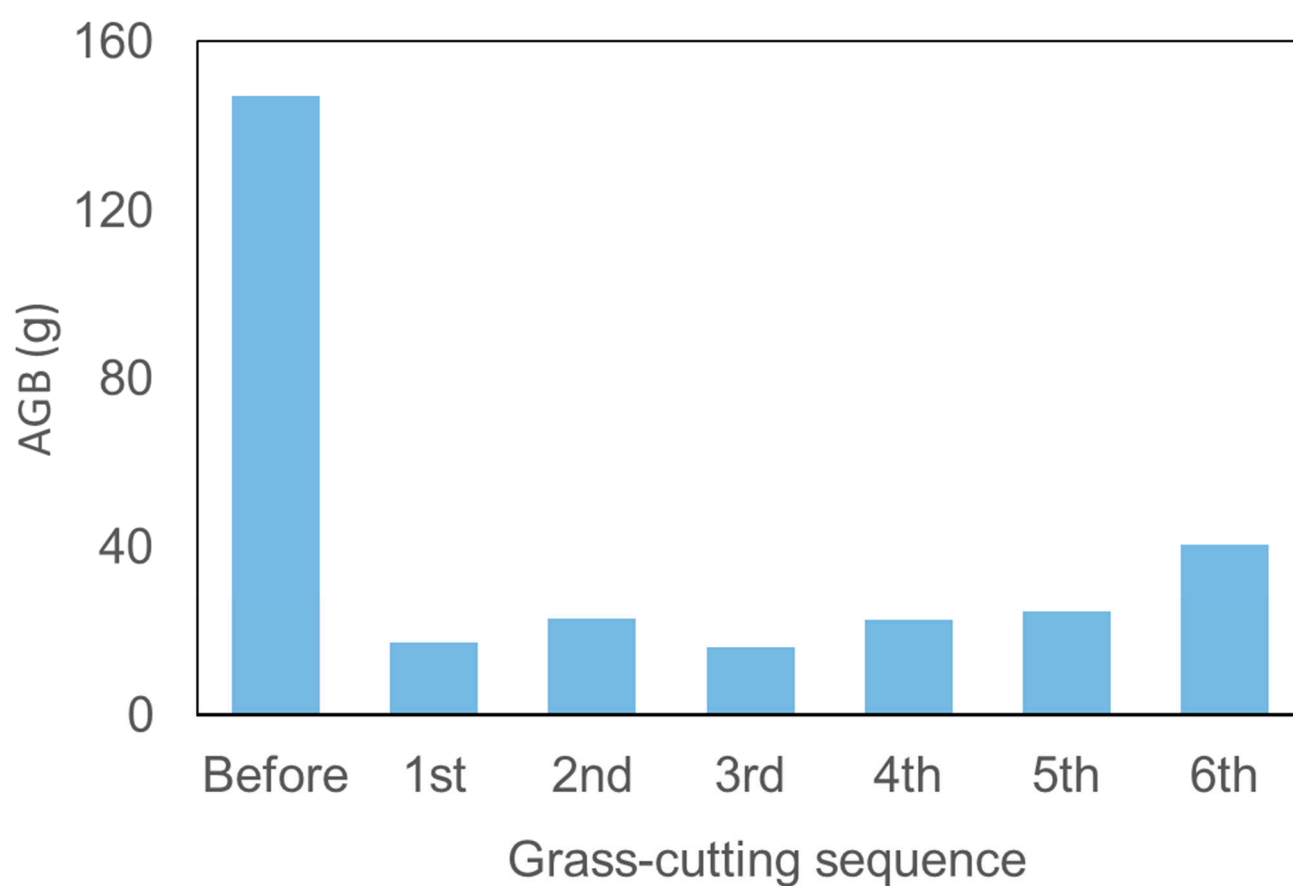

**Figure S1.** The amount of grass biomass (above-ground biomass, AGB) corresponding to each grass-cutting in an example quadrat.

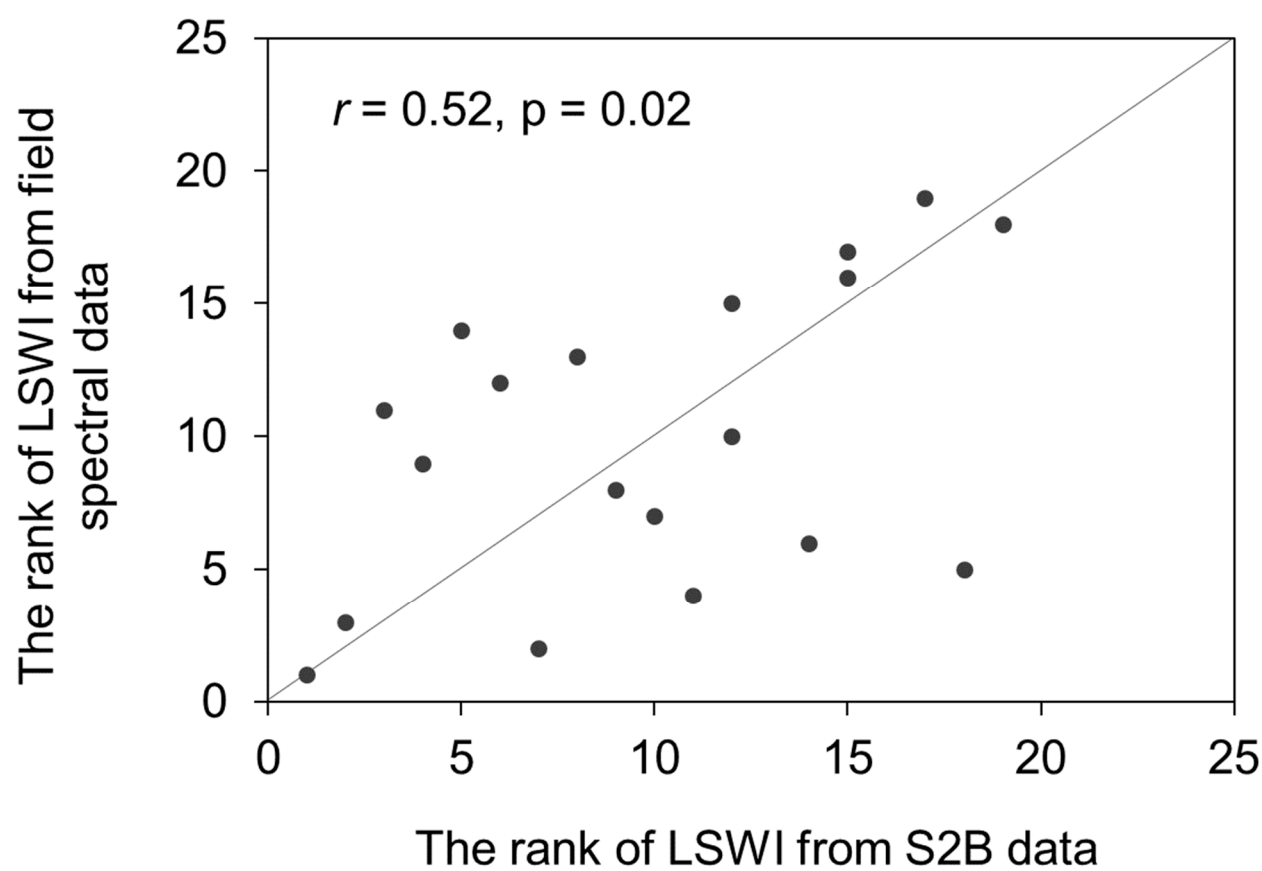

**Figure S2.** Correlations between LSWI retrieved from field spectral data and *in-situ* S2 dataset (2021/07/31) for 19 sampling plots.

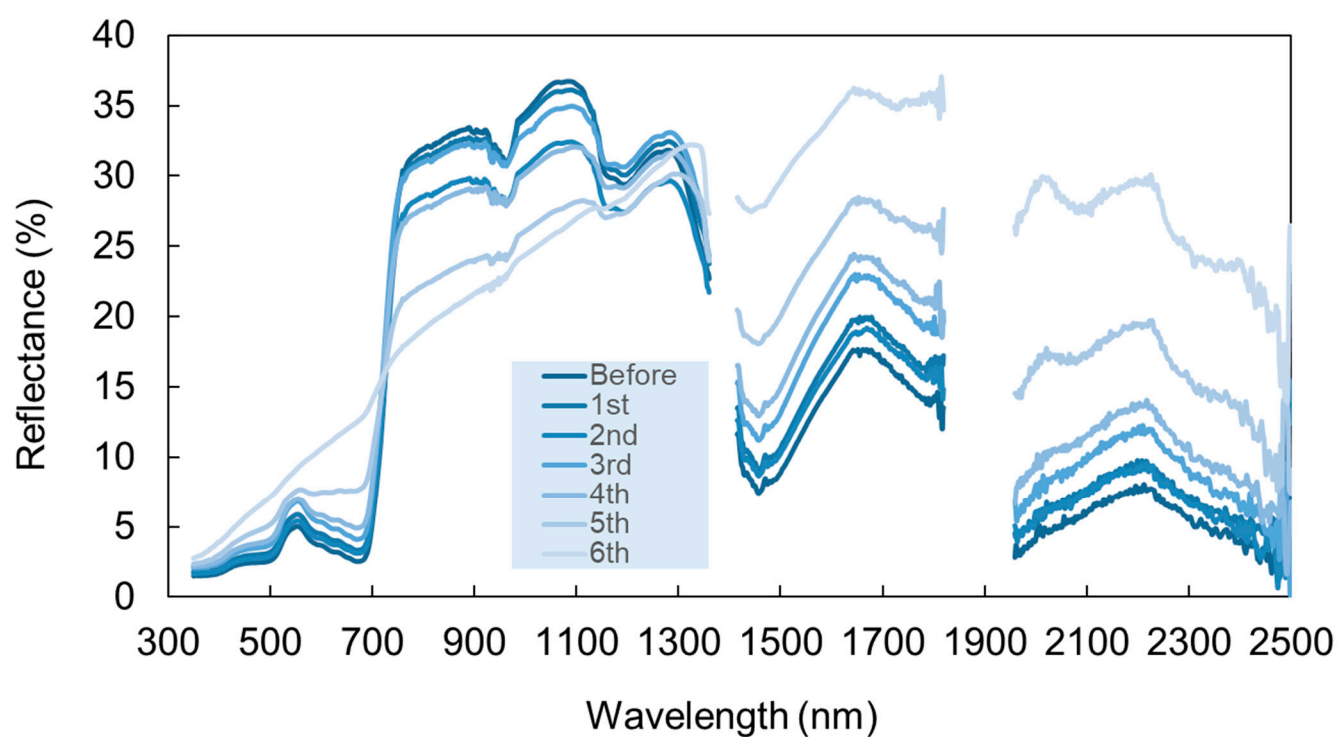

Figure S3. An example of spectral changes after each grass-cutting.

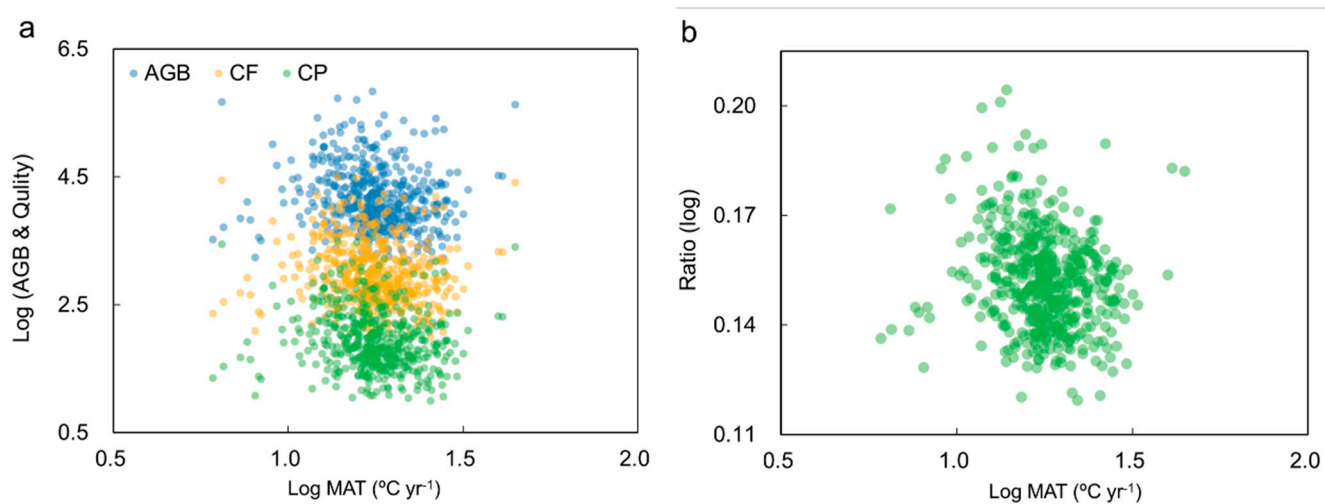

**Figure S4.** Changes in predicted forage biomass, CFarea and CParea (a) and the ratio between biomass based and CParea based carrying capacity (b) with mean annual temperature (MAT).

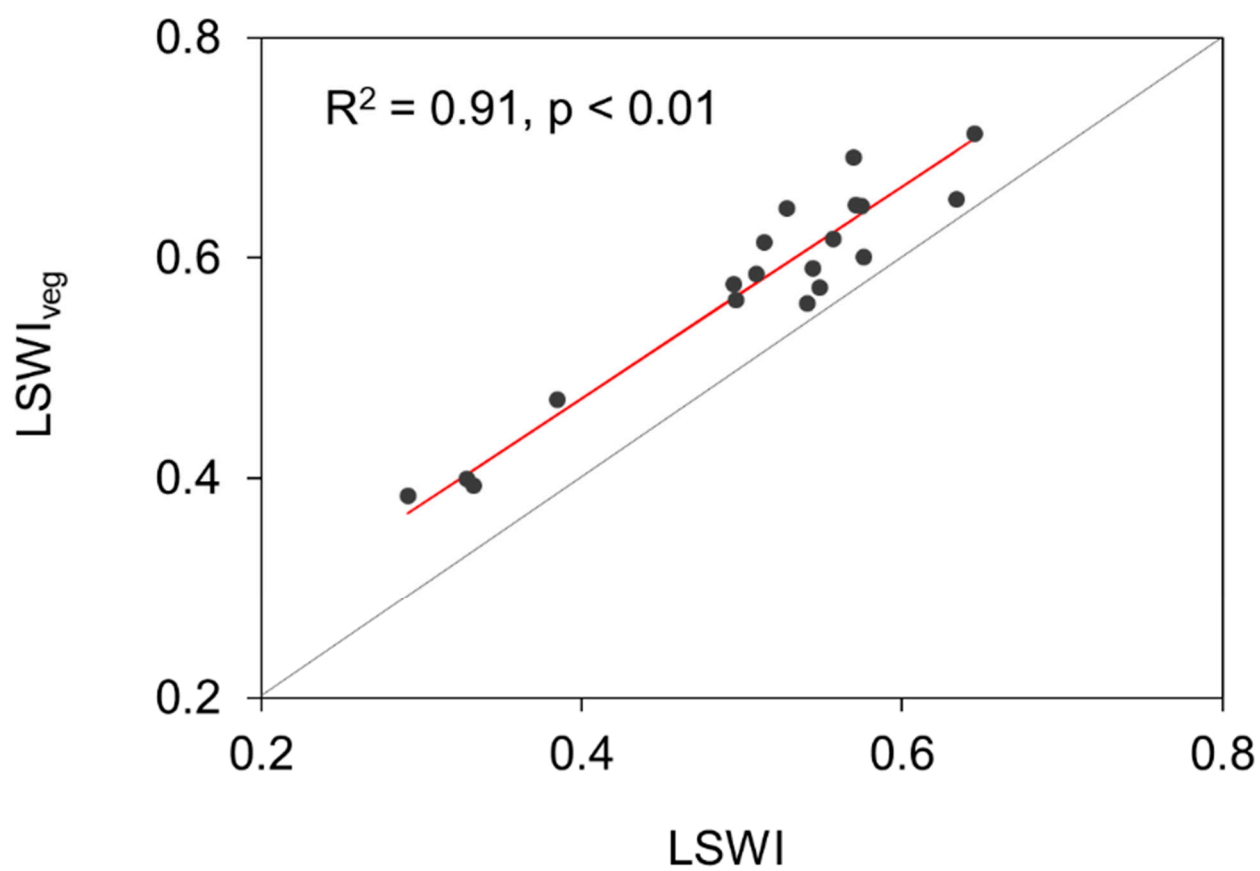

**Figure S5.** Correlations between LSWI retrieved from canopy reflectance with soil background (LSWI) and without soil background (LSWI<sub>veg</sub>) for 19 sampling plots.



## Reference

1. Shi, Y.; Ma, Y.; Ma, W.; Liang, C.; Zhao, X.; Fang, J.; He, J. Large scale patterns of forage yield and quality across Chinese grasslands. *Chin. Sci. Bull.* **2013**, *58*, 1187–1199.
